# Supplementary material for: NIS-initiated photo-induced oxidative decarboxylative sulfoximidation of cinnamic acids
Source: Royal Society of Chemistry journal article supplement (doi:10.1039/d3cc00142c), 2023-01-01

NC-SM-INT-A-1H

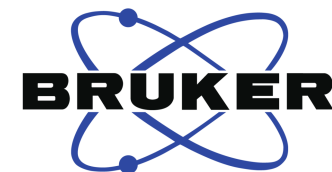

Current Data Parameters  
NAME NC-SM-INT-A-1H  
EXPNO 1  
PROCNO 1

F2 - Acquisition Parameters  
Date\_ 20230109  
Time 12.44 h  
INSTRUM spect  
PROBHD Z108618\_0877 (  
PULPROG zg30  
TD 55824  
SOLVENT CDCl3  
NS 16  
DS 2  
SWH 14097.744 Hz  
FIDRES 0.505078 Hz  
AQ 1.9798912 sec  
RG 199.59  
DW 35.467 usec  
DE 6.50 usec  
TE 297.4 K  
D1 1.00000000 sec  
TD0 1  
SFO1 400.2324716 MHz  
NUC1 1H  
P0 4.70 usec  
P1 14.10 usec  
PLW1 14.23600006 W

F2 - Processing parameters  
SI 32768  
SF 400.2300074 MHz  
WDW EM  
SSB 0  
LB 0.30 Hz  
GB 0  
PC 1.00

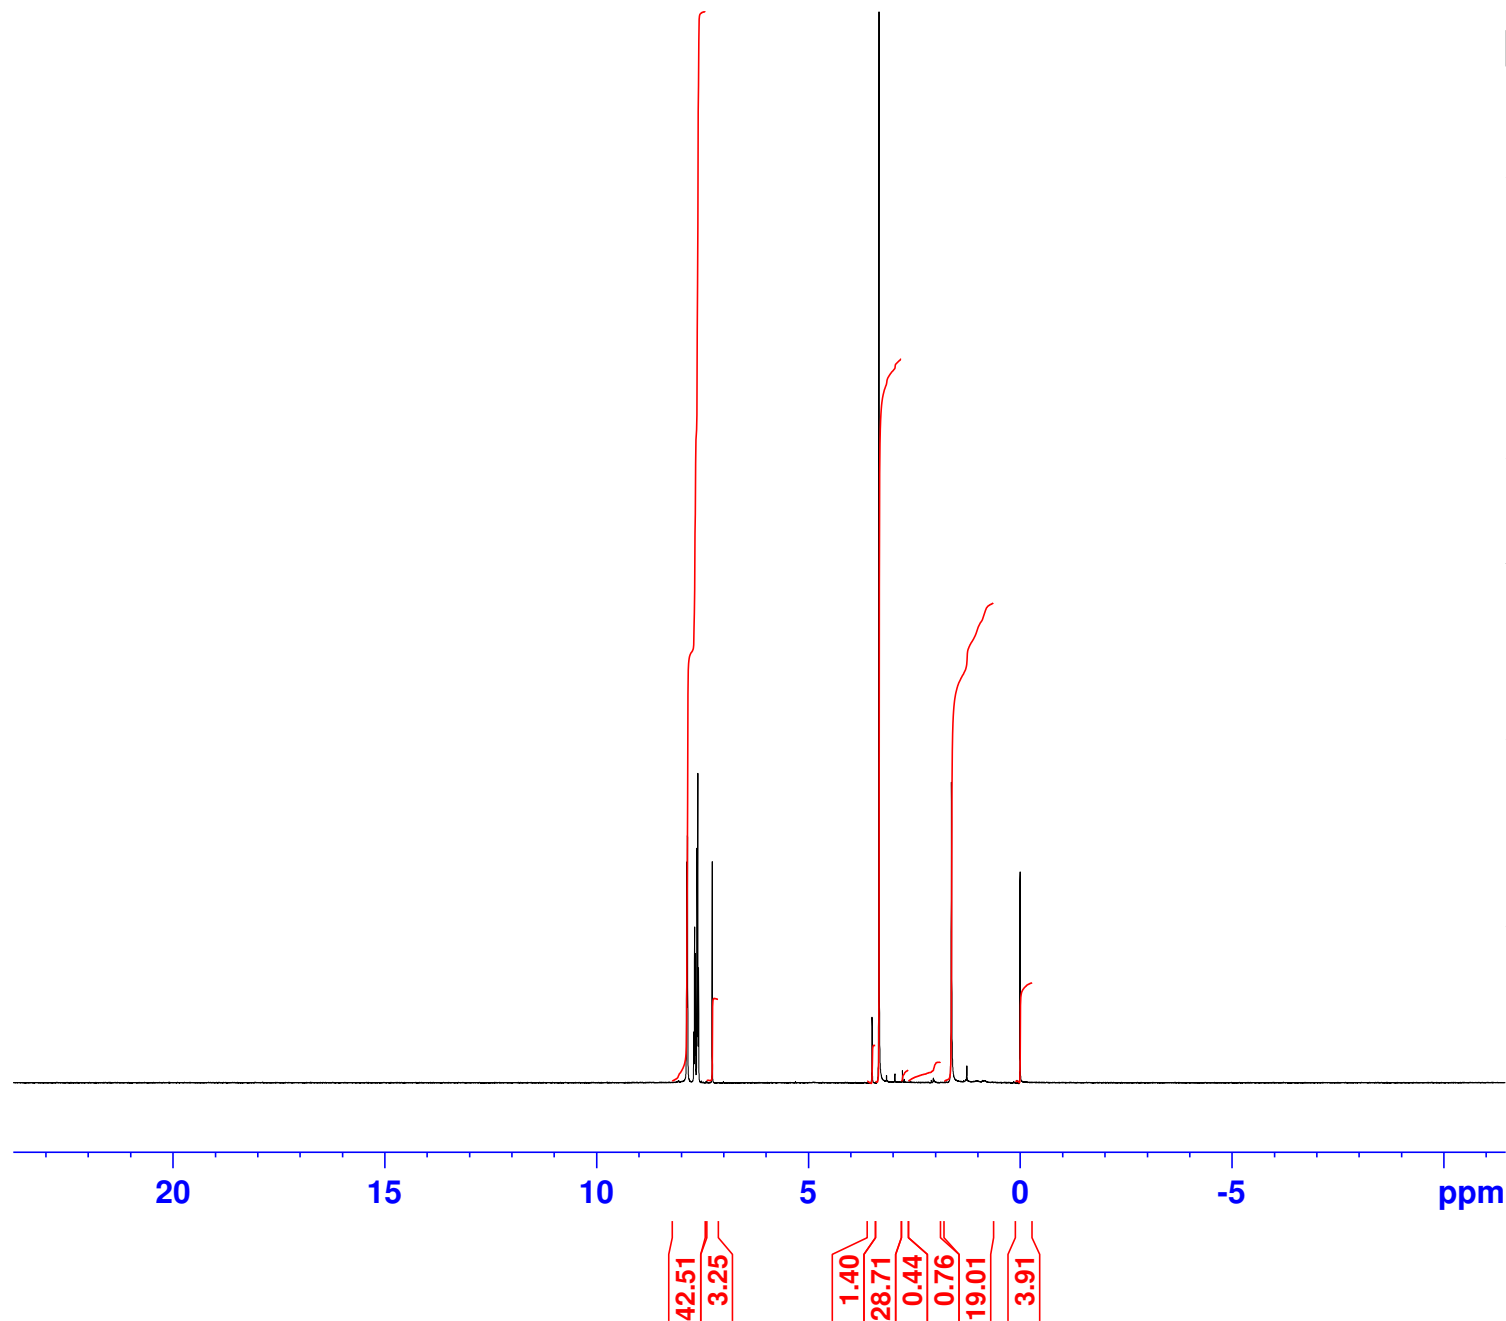

Supplement: d3cc00142c2.zip [file d3cc00142c2.zip]
