# Supplementary material for: NIS-initiated photo-induced oxidative decarboxylative sulfoximidation of cinnamic acids
Source: Royal Society of Chemistry journal article supplement (doi:10.1039/d3cc00142c), 2023-01-01
Supplement: d3cc00142c2.zip [file d3cc00142c2.zip]

NC-262-P-19F

-102.43  
-102.68  
-102.73  
-103.11  
-107.55  
-109.00  
-110.58  
-190.68  
-190.72  
-191.19  
-191.28  
-191.54  
-191.72  
-191.80  
-191.98  
-192.28  
-192.37  
-192.59  
-192.70  
-193.17  
-193.38  
-193.51  
-193.62  
-193.67  
-193.73  
-194.22  
-194.43  
-194.51  
-194.68  
-194.94  
-195.07  
-195.18  
-195.25  
-195.58  
-195.77  
-196.27  
-196.31  
-196.45  
-196.53  
-196.76  
-196.84  
-196.89  
-197.14  
-197.20  
-197.24  
-197.32  
-197.54  
-197.58  
-197.79  
-197.94  
-198.03  
-198.15  
-198.34  
-198.59  
-198.71  
-199.02  
-199.09  
-199.29  
-199.57  
-199.63  
-199.98  
-200.15  
-200.26  
-200.60  
-200.75  
-201.17

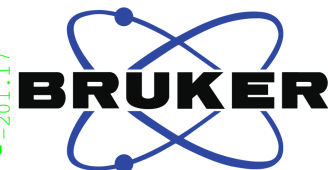

Current Data Parameters  
NAME NC-262-P-19F  
EXPNO 1  
PROCNO 1

F2 - Acquisition Parameters  
Date\_ 20221231  
Time 10.25 h  
INSTRUM spect  
PROBHD Z108618\_0877 (  
PULPROG zgfhigqn.2  
TD 131072  
SOLVENT CDCl3  
NS 64  
DS 4  
SWH 89285.711 Hz  
FIDRES 1.362392 Hz  
AQ 0.7340032 sec  
RG 199.59  
DW 5.600 usec  
DE 6.50 usec  
TE 296.7 K  
D1 1.00000000 sec  
D11 0.03000000 sec  
D12 0.00002000 sec  
TD0 1  
SFO1 376.5548010 MHz  
NUC1 19F  
P1 11.90 usec  
PLW1 21.71199989 W  
SFO2 400.2316009 MHz  
NUC2 1H  
CPDPRG[2] waltz16  
PCPD2 90.00 usec  
PLW2 14.23600006 W  
PLW12 0.34941000 W

F2 - Processing parameters  
SI 65536  
SF 376.5924602 MHz  
WDW EM  
SSB 0  
LB 0.30 Hz  
GB 0  
PC 1.00

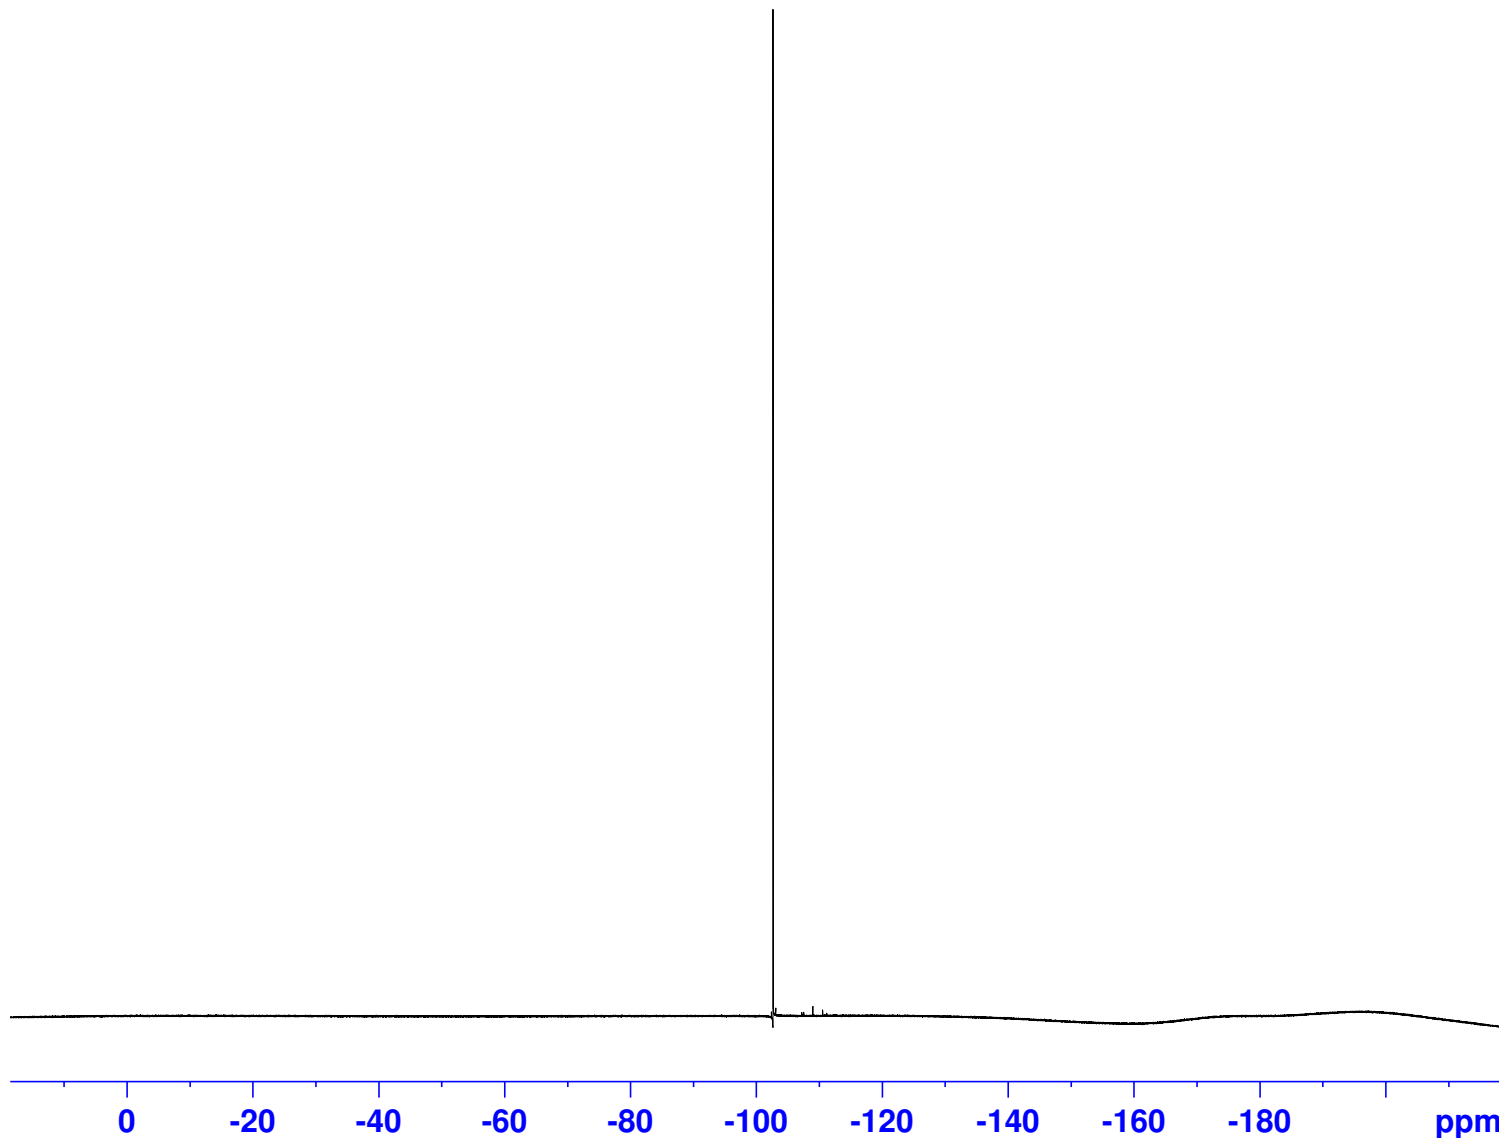

5.79

2.39

1.82
